# Supplementary material for: Wolbachia enhances the survival of Drosophila infected with fungal pathogens
Source: PubMed Central journal article supplement (PMC10592616; doi:10.1101/2023.09.30.560320), 2023-10-11
Supplement: NIHPP2023.09.30.560320V2-supplement-1.pdf [file NIHPP2023.09.30.560320V2-supplement-1.pdf]

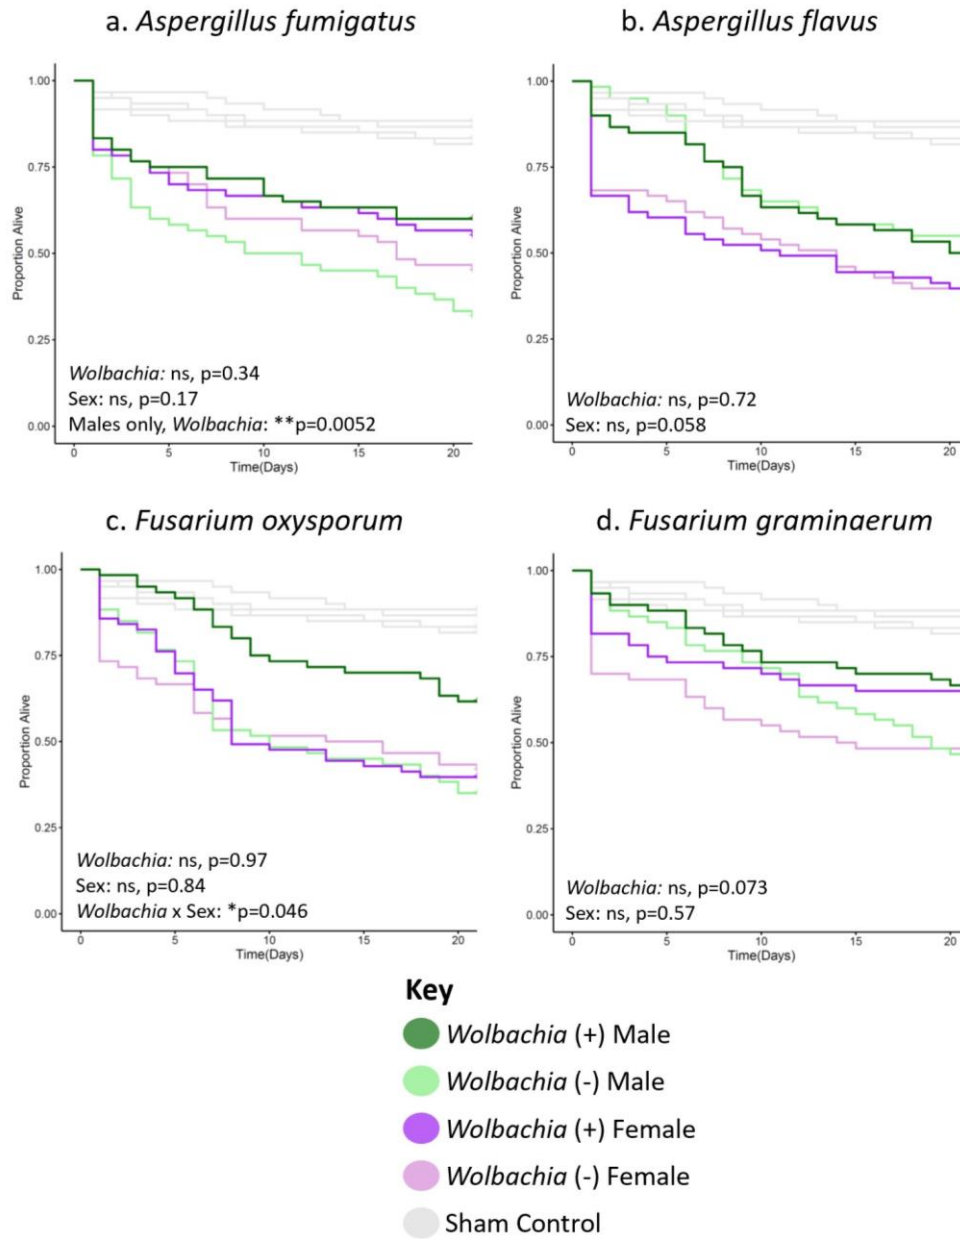

215  
216  
217  
218  
219  
220  
221  
222  
223

**Figure S1. *Wolbachia* does not increase the longevity of flies of the  $w^{1118}$  background line infected with several filamentous fungal pathogens.** Flies of each given background and sex were systemically infected with the indicated pathogen. Infections were performed with either (a) *Aspergillus fumigatus*, (b) *Aspergillus flavus*, (c) *Fusarium oxysporum*, or (d) *Fusarium graminearum*. Infections of all groups were performed side-by-side, along with those of the  $w^k$  background line (Figure 1), with at least two blocks of infections performed on different days. Each line represents a total of 60 flies. Sham controls were performed with sterile 20% glycerol. Full statistics, available in Table S1, were done with a Cox mixed effects model. Controls are the same in all panels and in panel S2a because they were performed concurrently in the same background.

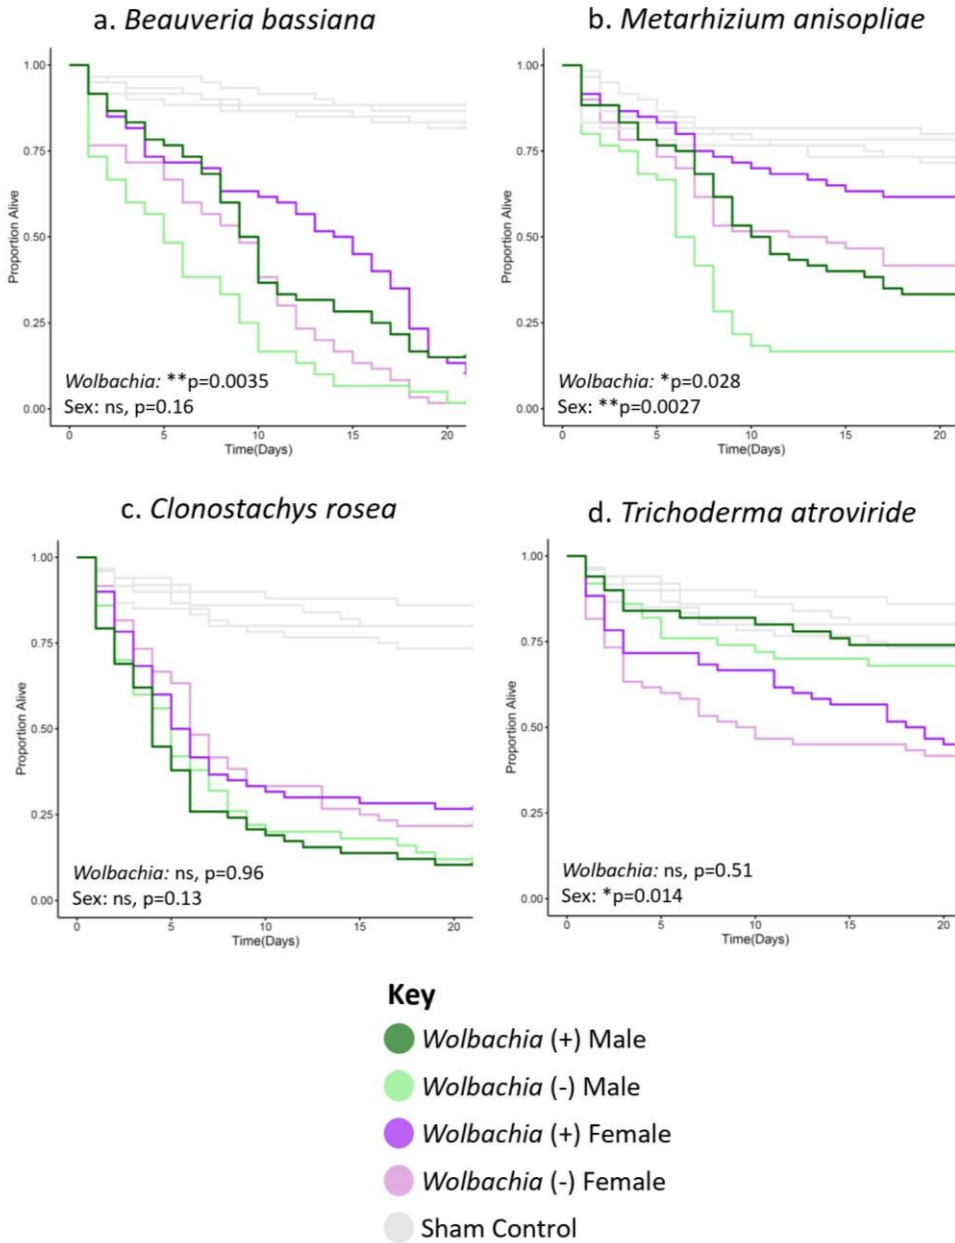

255  
256  
257  
258  
259  
260  
261  
262  
263  
264  
265

**Figure S2. *Wolbachia* increases the longevity of  $w^{1118}$  background line flies infected with certain filamentous fungal entomopathogens.** Flies of each given background and sex were systemically infected with the indicated pathogen. Infections were performed with either (a) *Beauveria bassiana*, (b) *Metarhizium anisopliae*, (c) *Clonostachys rosea*, or (d) *Trichoderma atroviride*. Infections of all groups were performed side-by-side, along with those of the  $w^k$  background line (Figure 2), with at least two blocks of infections performed on different days. Each line represents a total of 60 flies. Sham controls were performed with sterile 20% glycerol. Full statistics, available in Table S1, were done with a Cox mixed effects model. Controls for panel S2a are the same for Figure S1, and the panels in S2b-d are the same because they were performed concurrently in the same background.

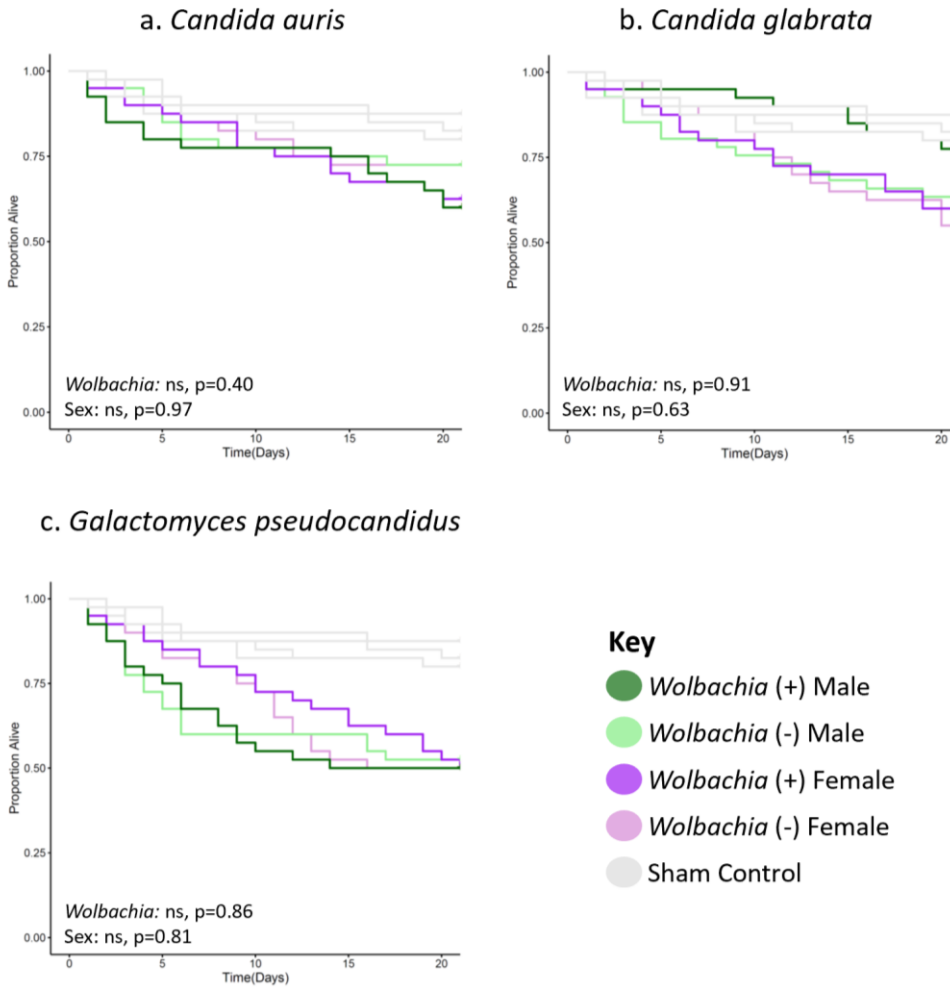

287  
288 **Figure S3. *Wolbachia* increases the longevity of flies of the  $w^{1118}$  background line infected with yeast pathogens.** Flies of  
289 each given background and sex were systemically infected with the indicated pathogen. Infections were performed with either (a)  
290 *Candida auris*, (b) *Candida glabrata*, or (c) *Galactomyces pseudocandidus*. Infections of all groups were performed side-by-side,  
291 along with those of the  $w^{1118}$  background line (Figure 3), with at least two blocks of infections performed on different days. Each  
292 line represents a total of 60 flies. Sham controls were performed with sterile 20% glycerol. Full statistics, available in Table S1,  
293 were done with a Cox mixed effects model. Controls are the same in all panels and because they were performed concurrently in  
294 the same background.  
295

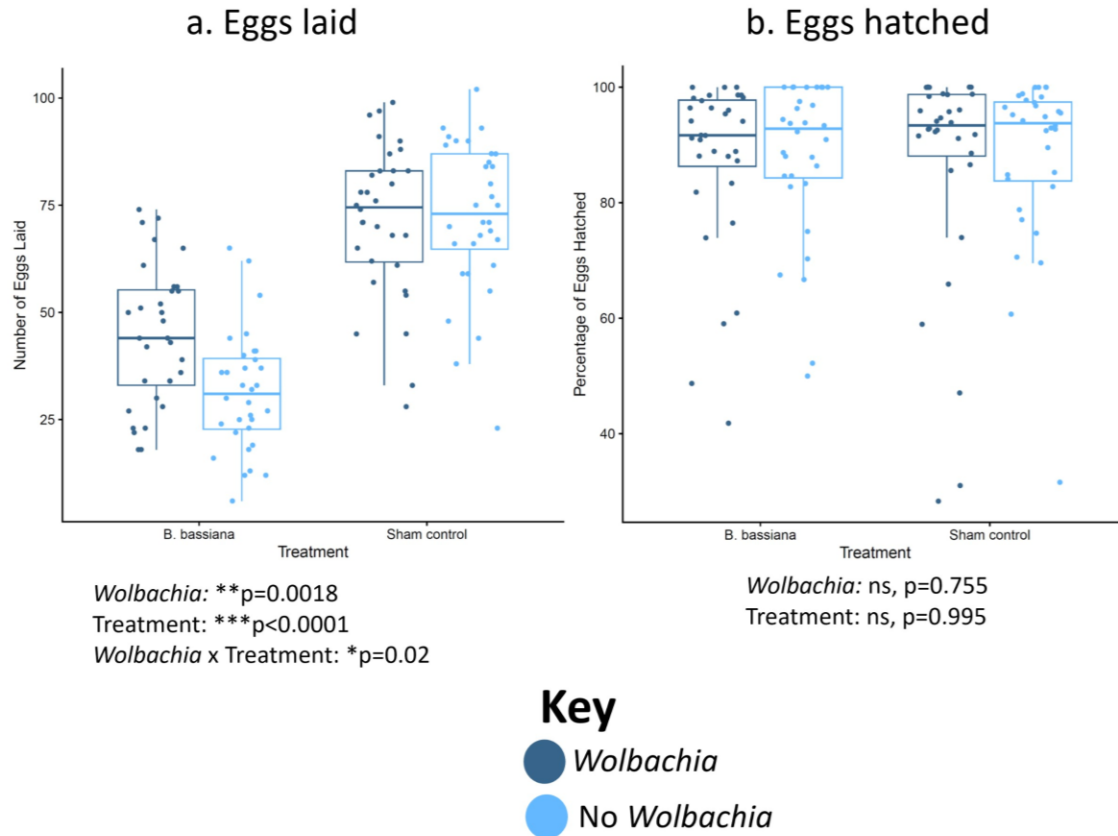

318  
319  
320  
321  
322  
323  
324  
325  
326  
327  
328

**Figure S4. *Wolbachia* increases the number of eggs laid but not the percentage of eggs hatched post-*B. bassiana* infection in the  $w^{1118}$  background line.** Female flies were systemically infected with *B. bassiana* or treated with a sham control. The flies then laid eggs for 3 days post-infection. (a) Numbers of eggs laid. (b) Proportion of eggs hatched. Each dot represents the total offspring of a single female, with an overall mean of 48 eggs laid. The boxes indicate the interquartile range. Outer edges of the box indicate 25<sup>th</sup> (lower) and 75<sup>th</sup> (upper) percentiles and the middle line indicates 50<sup>th</sup> percentile (median). Whiskers represent maximum and minimum ranges of data within 1.5 times the interquartile range of the box. Statistics are based on a logistic regression (Table S1). The entire experiment was performed twice, and graphs represent a combination of data from both blocks.

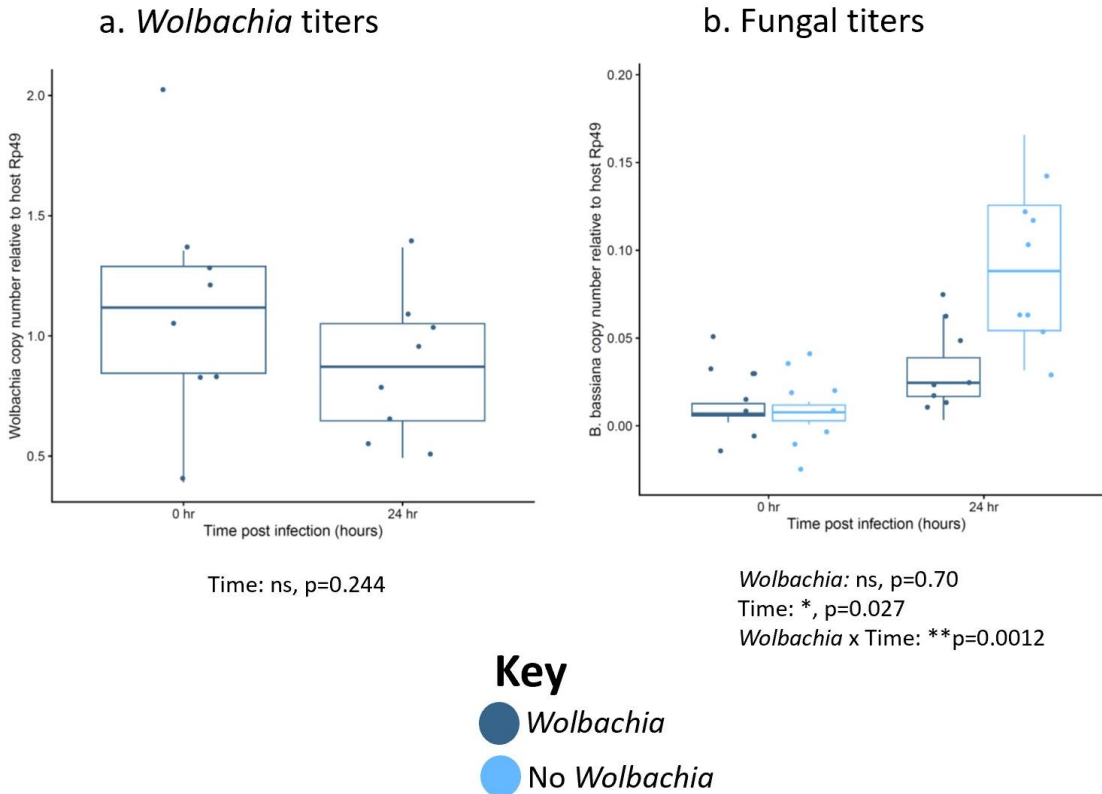

352  
353  
354  
355  
356  
357  
358  
359  
360

**Figure S5. *Wolbachia* associates with reduced pathogen titer after infection with no significant change in *Wolbachia* titer in *w<sup>1118</sup>* flies.** Female flies were systemically infected with the indicated fungal pathogen and pathogen titers were measured both immediately after infection and 24 h post-infection. Dots represent pools of 3 infected females. (a) *Wolbachia* titers. (b) *B. bassiana* titers. The boxes indicate the interquartile range. Outer edges of the box indicate 25<sup>th</sup> (lower) and 75<sup>th</sup> (upper) percentiles and the middle line indicates 50<sup>th</sup> percentile (median). Whiskers represent maximum and minimum ranges of data within 1.5 times the interquartile range of the box. Statistics are based on a logistic regression (Table S1). The entire experiment was performed twice, and graphs represent a combination of data from both blocks.

523 **Table S2. Microorganisms used in this study.**

| <b>Species (strain)</b>                                | <b>Microbial Classification</b> | <b>Isolation Source</b> | <b>Stock Number or Isolated/Gifted By</b> |
|--------------------------------------------------------|---------------------------------|-------------------------|-------------------------------------------|
| <i>Candida glabrata</i> (CBS 138)                      | Yeast                           | Feces                   | ATCC 2001                                 |
| <i>Candida auris</i>                                   | Yeast                           | Clinical isolate        | CDC B11903                                |
| <i>Galactomyces pseudocandidus</i>                     | Yeast                           | <i>Drosophila</i>       | Isolated by I. Nevarez-Saenz              |
| <i>Fusarium oxysporum</i> (f. sp. <i>Lycopersici</i> ) | Filamentous fungus              | Tomato                  | FGSC 9935                                 |

|                                                                                |                    |                                                             |                                               |
|--------------------------------------------------------------------------------|--------------------|-------------------------------------------------------------|-----------------------------------------------|
| <i>Beauveria bassiana</i> (GHA)                                                | Filamentous fungus | <i>Locusta migratoria</i>                                   | Gift from P. Shahrestani                      |
| <i>Aspergillus fumigatus</i>                                                   | Filamentous fungus | Clinical isolate                                            | FGSC 1100                                     |
| <i>Aspergillus flavus</i> (NRRL 3357)                                          | Filamentous fungus | Peanut                                                      | FGSC A1446                                    |
| <i>Metarhizium anisopliae</i> (recently renamed <i>Metarhizium robertsii</i> ) | Filamentous fungus | Insect                                                      | ARSEF 23                                      |
| <i>Clonostachys rosea</i>                                                      | Filamentous fungus | <i>Aedes albopictus</i> (mosquito) L4 larvae, Manhattan, KS | Isolated by P. Tawidian & gifted by K. Michel |
| <i>Trichoderma viride</i>                                                      | Filamentous fungus | <i>Aedes albopictus</i> (mosquito) L4 larvae, Manhattan, KS | Isolated by P. Tawidian & gifted by K. Michel |

594 **Table S3. Primers used in this study.**

| Gene                                    | Primer Name | Sequence                  |
|-----------------------------------------|-------------|---------------------------|
| <i>Wolbachia groEL</i>                  | groEL_F     | CTAAAGTGCTTAATGCTTCACCTTC |
|                                         | groEL_R     | CAACCTTTACTTCCTATTCTTG    |
| <i>Drosophila rp49</i>                  | Rp49_F      | CGGTTACGGATCGAACAAGC      |
|                                         | Rp49_R      | CTTGCGCTTCTTGAGGAGA       |
| <i>Beauveria bassiana gamma-tubulin</i> | Bbas_F      | CAGAGCGACGACACACGC        |
|                                         | Bbas_R      | CCCACGCCATTCTTGCCAATG     |

595
